# Supplementary material for: Spotted Fever Group Rickettsioses in Central America: The Research and Public Health Disparity among Socioeconomic Lines
Source: MDPI journal article supplement (doi:10.3390/insects13080674), 2022-07-27
Supplement: s1 [file s1]

**Supplementary Table S1.** Additional Metrics on SFGR *Rickettsia*-Related Articles from all Central American Countries

| Country     | Country(ies) of Foreign Collaborators                                         | Average Percentage of Authors from Original Country | Year of Publication                                                                  |
|-------------|-------------------------------------------------------------------------------|-----------------------------------------------------|--------------------------------------------------------------------------------------|
| Panama      | Brazil, Chile, Colombia, Mexico, South Africa, Uruguay, USA                   | 71.7                                                | 1950, 1952, 1953, 1956, 1975, 2007, '09, '11, '12, '13, '15, '16, '17, '18, '20, '21 |
| Costa Rica  | Brazil, Czech Republic, Germany, Guatemala, Italy, Panama, Mexico, Spain, USA | 74.4                                                | 1952, 1971, 1979, 1985, 1986, 2008, '11, '12, '13, '14, '15, '16, '17, '18, '19      |
| Belize      | Brazil, Canada, Grenada, USA                                                  | 16.7                                                | 2014, '16, '17                                                                       |
| El Salvador | Austria, Brazil, France, Russia, Slovak Republic, Spain, USA                  | 25.3                                                | 1993, 1996, 2012, '14, '21                                                           |
| Guatemala   | USA                                                                           | 36.4                                                | 2013                                                                                 |
| Nicaragua   | Costa Rica, Germany, Panama, USA                                              | 12.4                                                | 1971, 2016, '17, '18                                                                 |
| Honduras    | Brazil, Czech Republic, Panama, USA                                           | 10.0                                                | 1971, 2009, '10, '15, '21                                                            |
